# Supplementary material for: Germline Variants in Angiogenesis-Related Genes Contribute to Clinical Outcome in Head and Neck Squamous Cell Carcinoma
Source: MDPI journal article supplement (doi:10.3390/cancers14071844), 2022-04-06
Supplement: s1 [file s1]

**Table S1.** General characteristics of the studied patients.

| <b>Parameter</b>         | <b>RT alone<br/><i>n</i> = 219</b> | <b>RT + CT<br/><i>n</i> = 203</b> | <b>Total<br/><i>n</i> = 422</b> |
|--------------------------|------------------------------------|-----------------------------------|---------------------------------|
| Median age at diagnosis  |                                    |                                   |                                 |
| < 59 years               | 76 (35%)                           | 120 (59%)                         | 196 (46%)                       |
| ≥ 59 years               | 143 (65%)                          | 83 (41%)                          | 226 (54%)                       |
| Male                     | 175 (80%)                          | 164 (81%)                         | 339 (80%)                       |
| Female                   | 44 (20%)                           | 39 (19%)                          | 83 (20%)                        |
| Tumor site               |                                    |                                   |                                 |
| LSCC                     | 147 (67%)                          | 59 (29%)                          | 206 (49%)                       |
| OPSCC                    | 57 (26%)                           | 106 (52%)                         | 163 (39%)                       |
| HPSCC                    | 15 (7%)                            | 38 (19%)                          | 53 (12%)                        |
| T stage                  |                                    |                                   |                                 |
| T1                       | 49 (22%)                           | 6 (3%)                            | 55 (13%)                        |
| T2                       | 106 (49%)                          | 53 (26%)                          | 159 (38%)                       |
| T3                       | 48 (22%)                           | 83 (41%)                          | 131 (31%)                       |
| T4                       | 16 (7%)                            | 61 (30%)                          | 77 (18%)                        |
| N stage                  |                                    |                                   |                                 |
| N0                       | 154 (70%)                          | 33 (16%)                          | 187 (44%)                       |
| N1–3                     | 65 (30%)                           | 170 (84%)                         | 235 (56%)                       |
| Smoking status           |                                    |                                   |                                 |
| Never                    | 39 (18%)                           | 46 (23%)                          | 85 (20%)                        |
| Ever                     | 180 (82%)                          | 157 (77%)                         | 337 (80%)                       |
| Alcohol use <sup>a</sup> |                                    |                                   |                                 |
| Never                    | 50 (23%)                           | 47 (23%)                          | 97 (23%)                        |
| Ever                     | 168 (77%)                          | 154 (77%)                         | 322 (77%)                       |
| Overall survival         |                                    |                                   |                                 |
| Median (range) months    | 104 (4–136)                        | 70 (5–144)                        | 74 (4–144)                      |

RT, radiotherapy; RT+CT, combination treatment; LSCC, laryngeal squamous cell carcinoma; OPSCC, oropharyngeal squamous cell carcinoma; HPSCC, hypopharyngeal squamous cell carcinoma; <sup>a</sup> The missing data for three patients – one in the RT subset and two in the RT + CT subset.

**Table S2.** SNPs examined in the study and the genotype distribution in all patients.

| Gene   | SNP       | Allele             | Location | Genotype distribution <sup>a</sup> | Function class <sup>b</sup>                    | RegDB rank <sup>c</sup> | EUR frequency <sup>d</sup> | MAF  | HWE <i>p</i> -Value  |
|--------|-----------|--------------------|----------|------------------------------------|------------------------------------------------|-------------------------|----------------------------|------|----------------------|
| PDGFRA | rs2228230 | Val824Val, 2547C>T | exon 18  | 318/94/9                           | S, splicing (ESE/ESS)                          | 5                       | 0.15                       | 0.13 | 0.51                 |
|        | rs1800812 | -635G>T            | promoter | 281/118/22                         | TFBS                                           | 2b                      | 0.21                       | 0.19 | 0.04                 |
| PDGFRB | rs2302273 | -302G>A            | 5'UTR    | 290/110/18                         | TFBS                                           | 1f                      | 0.19                       | 0.17 | 0.07                 |
|        | rs246395  | Leu867Leu, 2601T>C | exon 19  | 202/177/43                         | S, splicing (ESE/ESS)                          | 5                       | 0.30                       | 0.31 | 0.65                 |
| PDGFB  | rs5757573 | c.64-1743T>C       | intron 2 | 177/188/55                         | -                                              | 1f                      | 0.38                       | 0.35 | 0.65                 |
|        | rs2285094 | c.602-708T>C       | intron 6 | 72/287/62                          | -                                              | 4                       | 0.46                       | 0.49 | < 1x10 <sup>-6</sup> |
| FGF2   | rs1449683 | Ser52Ser, 156C>T   | exon 1   | 347/70/2                           | S                                              | 2b                      | 0.10                       | 0.09 | 0.44                 |
|        | rs1048201 | 626C>T             | 3'UTR    | 268/140/13                         | miRNA binding site                             | 7                       | 0.18                       | 0.20 | 0.30                 |
| FGFR2  | rs2981582 | IVS2 + 906C>T      | intron 2 | 156/196/70                         | -                                              | 2b                      | 0.42                       | 0.40 | 0.53                 |
| MMP2   | rs243865  | -1306C>T           | promoter | 249/151/22                         | TFBS                                           | 1f                      | 0.27                       | 0.23 | 0.89                 |
|        | rs7201    | 260A>C             | 3'UTR    | 135/208/78                         | TFBS,<br>miRNA binding site                    | 5                       | 0.48                       | 0.43 | 0.89                 |
| MMP9   | rs17576   | Gln279Arg, 836A>G  | exon 6   | 152/216/54                         | NS, splicing (ESE/ESS)                         | 4                       | 0.38                       | 0.38 | 0.09                 |
|        | rs17577   | Arg668Gln, 2003G>A | exon 12  | 294/118/10                         | NS, splicing (ESE/ESS),<br>miRNA binding site  | 2b                      | 0.17                       | 0.16 | 0.65                 |
| TIMP1  | rs4898    | Phe124Phe, 327T>C  | exon 5   | 193/47/182                         | S, splicing (ESE/ESS), miR-<br>NA binding site | 4                       | 0.46                       | 0.49 | < 1x10 <sup>-6</sup> |
|        | rs2070584 | g.9830T>G          | 3'UTR    | 201/47/174                         | -                                              | 2b                      | 0.45                       | 0.47 | < 1x10 <sup>-6</sup> |
| TIMP2  | rs2277698 | Ser101Ser, 303C>T  | exon 3   | 328/87/7                           | S, splicing (ESE/ESS)                          | 5                       | 0.13                       | 0.12 | 0.66                 |
|        | rs7501477 | -4804G>T           | promoter | 327/87/8                           | TFBS                                           | 2b                      | 0.10                       | 0.12 | 0.44                 |
| TIMP3  | rs9862    | His83His, 249C>T   | exon 3   | 114/208/100                        | S, splicing (ESE/ESS)                          | 3a                      | 0.49                       | 0.48 | 0.79                 |
|        | rs9619311 | -1296T>C           | promoter | 195/179/46                         | TFBS                                           | 4                       | 0.31                       | 0.32 | 0.61                 |

SNP, single nucleotide polymorphism; MAF, minor allele frequency in the studied group (*n* = 422); HWE, Hardy-Weinberg equilibrium; S, synonymous; NS, nonsynonymous; TFBS, transcription factor binding site; ESE/ESS, exonic splicing enhancer/exonic splicing silencer; <sup>a</sup> The genotype distribution shown in order of common homozygote/heterozygote/variant homozygote; <sup>b</sup> According to <https://snpinfo.niehs.nih.gov/snpinfo/snpfunc.html>; <sup>c</sup> According to [www.regulomedb.org](http://www.regulomedb.org); <sup>d</sup> SNP frequency in European population according to [www.ensembl.org](http://www.ensembl.org).
